# Supplementary material for: RNAi-Dependent and Independent Control of LINE1 Accumulation and Mobility in Mouse Embryonic Stem Cells
Source: PLOS journal article supplement (doi:10.1371/journal.pgen.1003791), 2013-11-07
Supplement: S7 (10.1371/journal.pgen.1003791.s007) [file journal.pgen.1003791.s007]

**Table S1**: Primer sequences

| **Primers** | **5' to 3'** |
| --- | --- |
| Rrm2_F | CCGAGTCGGAAAGTAAAGCG |
| Rrm2_R | ATGGGAAAGACAACGAAGCG |
| L1_ORF2_F | GGAGGGACATTTCATTCTCATCA |
| L1_ORF2_R | GCTGCTCTTGTATTTGGAGCATAGA |
| Chr17_Tf_L1_F | GTTCTGTGACTCCTGAAAATGCA |
| Chr17_Tf_L1_R | GAGTGCCTGAAACTGGGCTTA |
| eGFP_F | TATATCATGGCCGACAAGCA |
| eGFP_R | GAACTCCAGCAGGACCATGT |
| Hmga2_F | CAGCCCAGAAGAAAGCAGAG |
| Hmga2_R | TTGTGGCCATTTCCTAGGTC |
| L1_Tf_F | CAGCGGTCGCCATCTTG |
| L1_Tf_R | CACCCTCTCACCTGTTCAGACTAA |
| L1_Gf_F | CTCCTTGGCTCCGGGACT |
| L1_Gf_R | CAGGAAGGTGGCCGGTTGT |
| L1_A_F | GGATTCCACACGTGATCCTAA |
| L1_A_R | TCCTCTATGAGCAGACCTGGA |
| Btg2_F | GCGAGCAGAGACTCAAGGTT |
| Btg2_R | TAGCCAGAACCTTTGGATGG |
| Fgf5_F | TGTACTGCAGAGTGGGCATC |
| Fgf5_R | ACAATCCCCTGAGACACAGC |
| Sox2_F | CACAGATGCAACCGATGCA |
| Sox2_R | GGTGCCCTGCTGCGAGTA |
|  |  |
| **Small RNAs** | **5' to 3'** |
| U6 | Hs_RNU6-2_1 (Qiagen) |
| miR-295 | AAAGUGCUACUACUUUUGAGUCU |
| miR-302d | UAAGUGCUUCCAUGUUUGAGUGU |
| miR-16 | UAGCAGCACGUAAAUAUUGGCG |
| miR-21 | UAGCUUAUCAGACUGAUGUUGA |
| miR-320 | AAAAGCUGGGUUGAGAGGGCGA |
| L1_5'-UTR+ | GCTGCTGTGGCTTAGGTCGCCTCCCC |
| L1_5'-UTR- | CGGACCAAGATGGCGACCGCTGC |
|  |  |
| **Genotyping Primers** | **5' to 3'** |
| DICER 460 R | GTACGTCTACAATTGTCTATG |
| DICER 23 F | ATTGTTACCAGCGCTTAGAATTCC |
| DICER 458 F | TCGGAATAGGAACTTCGTTAAAC |
| CRE_F | TTGCCCCTGTTTCACTAT |
| CRE_R | ATGGATTTCCGTCTCTGG |
|  |  |
| **Strand-specific RT** | **5' to 3'** |
| RT1 | CACAGAGGCGCTGAGGCAT |
| RT2 | CGTCCAGGAGGAGGTCCAA |
| RT3 | TTGGACCTCCTCCTGGACG |
| RT4 | ATGCCTCAGCGCCTCTGTG |
